# Supplementary material
Source: PubMed Central journal article supplement (PMC3549076)

# Supporting Information

Zhang et al. 10.1073/pnas.1208334110

## SI Materials and Methods

**Cell Culture, Transfection, and Retroviral Infection.** All cells were maintained in DMEM with 10% serum, either FBS or calf serum (CS), as designated in the methods below. Transfections were performed using oligofectamine (Invitrogen) for siRNA transfections, Lipofectamine 2000 (Invitrogen) for siRNA cotransfected with plasmids, and FuGene 6 (Roche) or Lipofectamine 2000 (Invitrogen) for plasmid-only transfections according to manufacturer's protocols with the indicated plasmids. The  $p53^{-/-}$  MycER and  $p53^{-/-}$  MycER<sup>N6KR</sup> mice embryo fibroblasts (MEFs),  $ARF^{-/-}$   $p53^{-/-}$  (DKO) MycER and DKO MycER<sup>N6KR</sup> MEFs, and  $Egr1^{-/-}$  MycER<sup>N6KR</sup> and WT MycER<sup>N6KR</sup> MEFs were generated by retroviral infection as described previously (1) using the pBabe hygro-MycER or pBabe hygro-MycER<sup>N6KR</sup> vector. The  $p53^{-/-}$  and DKO MycER MEFs stably expressing T7-Skp2 were generated using retroviral infection of pBabe puro-T7-Skp2 and pBabe hygro-MycER as described previously (1).

**Plasmids and Expression Vectors.** The mouse c-Myc expression vectors pRCMV-c-Myc and retroviral pBabe hygro-c-MycER have been previously described (2). The pBabepuro-T7-Skp2 expression vector was generated by PCR amplification of T7-tagged mouse Skp2 from pCGT-T7-Skp2 and cloning into pBabe puro vector using primers with EcoRI sites at both ends: forward: 5'-GCGCGAATTGCGCCACCATTGGCTTCTAGGATGGCATC-3' and reverse: 5'-GCGCGAATTCTCATCATAGACAACTGGGCTTTTGCAGTG-3'. The EcoRI fragment was digested and inserted into the EcoRI site of the retroviral pBabe puro vector. The pBabe-hygro-MycER<sup>N6KR</sup> expression vector was generated using PCR-mediated mutagenesis (Clontech) with the pBabehygro-MycER vector as template and changing the c-Myc N-terminal domain 6 lysines to arginines. Mouse c-Myc167 was generated using PCR-mediated mutagenesis (Clontech) as previously described (1). All of the constructs were verified by sequencing and expression of all constructs was confirmed by immunoblot analysis.

**Cycloheximide Chase Analysis.** Cells were plated at a density of  $5 \times 10^5$  cells/6-cm dish and allowed to grow overnight. Cells were treated with 50  $\mu$ M cycloheximide (CHX) to block protein synthesis and harvested at the indicated times. Immunoblot analysis was performed by using anti-Mycfl (Millipore), band intensities were measured by scanning densitometry (UN-Scan-It; Silk Scientific), and protein half-lives were calculated from the resultant data.

**Apoptosis Assays.** DKO MycER, DKO MycER<sup>N6KR</sup>,  $p53^{-/-}$  MycER, and  $p53^{-/-}$  MycER/Skp2 MEFs were plated at  $1 \times 10^5$  cells/35-mm dish in triplicate. Twenty-four hours later, cells were shifted into media containing 1% CS and treated with 2  $\mu$ M hydroxytamoxifen (OHT) or ethanol; 2  $\mu$ M OHT or ethanol was added daily.  $Egr1^{-/-}$  MycER<sup>N6KR</sup> and WT MycER<sup>N6KR</sup> MEFs were shifted into media containing 2% FBS and treated daily with 2  $\mu$ M OHT or ethanol. DKO MycER MEFs transfected with siRNA were replated at  $2 \times 10^5$  cells/35-mm dish in media containing 10% CS and treated daily with 2  $\mu$ M OHT or ethanol. HeLa cells were seeded at  $1.5 \times 10^5$ /35-mm dish and transfected the next day. Two days following transfection, the HeLa cells were either kept in 10% FBS or shifted to 0.1% FBS for 10 h. The number of floating (apoptotic) and attached (living) cells was counted at the indicated times with a hemacytometer. All results are reported as the number of

dead cells divided by number of total cells multiplied by 100 (percent dead). At least three different experiments were performed with two different independently derived polyclonal cell lines.

## Quantitative Real-Time PCR Primers.

|                  |                                                                               |
|------------------|-------------------------------------------------------------------------------|
| <i>Nucleolin</i> | Forward: 5'-ACACCAGCCAAAGTCATTCC-3'<br>Reverse: 5'-ATCCTCATCACTGTCTTCTTC-3'   |
| <i>CDK4</i>      | Forward: 5'-GCAGTCTACATACGCAACAC-3'<br>Reverse: 5'-TCGTCTTCTGGAGGCAATC-3'     |
| <i>elF4E</i>     | Forward: 5'-GGACGGGATTGAGCCTATGTG-3'<br>Reverse: 5'-CAGCAGTGTCTTAGCCAGAAG-3'  |
| <i>RCL</i>       | Forward: 5'-GGTTCCAGGTGTGGGACTACG-3'<br>Reverse: 5'-GAAGATAAGCCTCAAAGTACCG-3' |
| $\beta$ -Actin   | Forward: 5'-GCTGTGCTATGTTGCTCTAG-3'<br>Reverse: 5'-CGCTCGTTGCCAATAGTG-3'      |
| <i>EGR1</i>      | Forward: 5'-GAGGAGATGATGCTGCTGAG-3'<br>Reverse: 5'-TGCTGCTGCTGCTATTACC-3'     |
| <i>Bim</i>       | Forward: 5'-CGGATCGGAGACGAGTTCA-3'<br>Reverse: 5'-TTCCAGCCTCGCGGTAATCA-3'     |
| <i>Skp2</i>      | Forward: 5'-GCTTCAGTCTTTCCGGGTAC-3'<br>Reverse: 5'-CGGCAGATTCAGAAAACCCA-3'    |

## ChIP Real-Time Primers.

|             |                                                                                   |
|-------------|-----------------------------------------------------------------------------------|
| <i>Egr1</i> | Forward: 5'-CTAACCATCACAGAACCAACAG-3'<br>Reverse: 5'-ACTAATGGCAGGGTCACTTTC-3'     |
| <i>Tert</i> | Forward: 5'-AAGAAGTGAAGTTGCCACCACCA-3'<br>Reverse: 5'-GATGGTCACAATGCTGGTGCATGA-3' |

**Luciferase Reporter Assays.** For transient Myc overexpression experiments, DKO MEFs were transfected with 2  $\mu$ g of c-Myc or empty vector, 1.9  $\mu$ g of firefly luciferase reporter plasmid having either the *Egr1* promoter region described previously (3) or the canonical 4XEMS promoter (1), and 0.1  $\mu$ g of pRL-TK (Renilla luciferase) internal control in triplicate. For the assays in Rat1a cells, 3.9  $\mu$ g of reporter plasmid, 0.1  $\mu$ g of pRL-TK or pRL-SV40, and 3  $\mu$ g Skp2 or empty vector were transfected into the cells. Luciferase assays were carried out 48 h after transfection according to the manufacturer's instructions (dual-luciferase reporter assay system; Promega). For experiments involving OHT induction of DKO and  $p53^{-/-}$  MEFs stably expressing c-MycER or c-MycER<sup>N6KR</sup>, cells were plated in six-well plates and grown overnight. At ~50% confluency, cells were transfected with 0.8  $\mu$ g of reporter plasmid, 0.1  $\mu$ g of pRL-TK internal control, and 0.1  $\mu$ g of GFP expression plasmid in triplicate. To evaluate the effect of Skp2 on reporter activation by activated c-MycER, 1  $\mu$ g of T7-Skp2 expression vector or empty vector was cotransfected with the luciferase reporters. Approximately 18 h after transfection, cells were shifted to low serum medium (DMEM with 0.1% FBS) and incubated for 24 h. Cells were then treated with 2  $\mu$ M OHT or ethanol for 6 h. Cell lysates were prepared in Reporter Lysis Buffer (Promega) with protease inhibitors, and luciferase assays were carried out as described above. Firefly luciferase results were normalized for expression of Renilla luciferase from pRL-TK and are reported as the mean  $\pm$  SEM from triplicate samples.

PNAS

PNAS

- PNAS

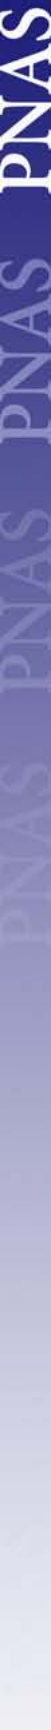

PNAS



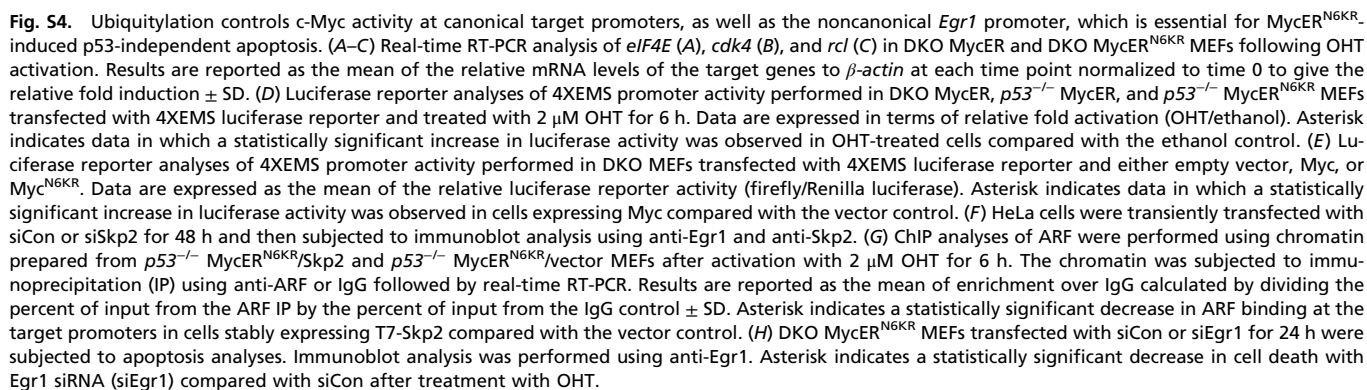

Supplement: 1208334110_pnas.201208334SI.pdf [file 1208334110_pnas.201208334SI.pdf]
